# Supplementary material for: Mechanistic basis of atypical TERT promoter mutations
Source: PubMed Central journal article supplement (PMC11574208; doi:10.1038/s41467-024-54158-5), 2024-11-18
Supplement: 41467_2024_54158_MOESM2_ESM.pdf [file 41467_2024_54158_MOESM2_ESM.pdf]

## **Description of Additional Supplementary Files**

File Name: Supplementary Data 1

Description: Code/scripts underlying analyses in this study
